# Supplementary material for: Transcriptome and 16S rRNA Analyses Reveal That Hypoxic Stress Affects the Antioxidant Capacity of Largemouth Bass (Micropterus salmoides), Resulting in Intestinal Tissue Damage and Structural Changes in Microflora
Source: MDPI journal article supplement (doi:10.3390/antiox12010001), 2022-12-20
Supplement: s1 [file s1]

# Supplementary Materials:

**Table S1.** Sequences of primers used for qRT-PCR.

| Name            | Accession number | Primer sequence (5'-3')                             |
|-----------------|------------------|-----------------------------------------------------|
| <i>mapk11</i>   | XM_038738930.1   | F: TTACGACAGAAGGTTGCGGT<br>R: CTAATGTTGCGGCAGGTGTG  |
| <i>atf2</i>     | XM_038720530.1   | F: TACGATGGGCTTGTGTTCCG<br>R: GAGTCACGGAAGAGTGCGA   |
| <i>tnfrsf1a</i> | XM_038711147.1   | F: CTTGGCAGAGAGGGGCAAC<br>R: CATCTGAGGTCAACTGGACGG  |
| <i>elk1</i>     | XM_038721756.1   | F: ATCCACGGCTCGGACATTTT<br>R: AACAGACGACGAGCGAAGAG  |
| <i>map2k4b</i>  | XM_038735280.1   | F: GCAGCAGCATGCAAGGTAAA<br>R: CGCTCTATGTGAGGGTTCTGG |
| <i>tgf-β2</i>   | XM_038710299.1   | F: GCACGGTTTGCAGGAATTGA<br>R: GACTCCAGCCGGTATGAAGG  |
| <i>duosp5</i>   | XM_038713959.1   | F: GATGCGGCCTTCGACATCAT<br>R: GCGTGGTAGGTTTCAGGTGTG |
| <i>β-actin</i>  | XM_038695351.1   | F: ATCGCCGCACTGGTTGTTGAC<br>R: CCTGTTGGCTTTGGGGTTC  |

**Table S2.** Effects of different low dissolved oxygen levels on 96 h mortality (%) of largemouth bass. overview of tran scriptome sequencing reads and quality filtering of largemouth bass.

| Sample | Raw Data |       | Valid Data |       | Valid Ratio<br>(reads) | Q20%  | Q30%  | GC content% |
|--------|----------|-------|------------|-------|------------------------|-------|-------|-------------|
|        | Read     | Base  | Read       | Base  |                        |       |       |             |
| Ctrl1  | 50006644 | 7.50G | 46246716   | 6.94G | 92.48                  | 99.96 | 98.17 | 47.50       |
| Ctrl2  | 42367108 | 6.36G | 38108322   | 5.72G | 89.95                  | 99.97 | 98.19 | 49          |
| Ctrl3  | 39878200 | 5.98G | 36515778   | 5.48G | 91.57                  | 99.96 | 98.13 | 48.50       |
| Hyp1   | 44148112 | 6.62G | 39657008   | 5.95G | 89.83                  | 99.97 | 98.16 | 48          |
| Hyp2   | 45814852 | 6.87G | 41195552   | 6.18G | 89.92                  | 99.97 | 98.09 | 48          |
| Hyp3   | 42749920 | 6.41G | 36835290   | 5.53G | 86.16                  | 99.97 | 98.13 | 48          |
| Rec1   | 36223342 | 5.43G | 31738670   | 4.76G | 87.62                  | 99.96 | 98.18 | 47.50       |
| Rec2   | 43310240 | 6.50G | 40021578   | 6.00G | 92.41                  | 99.96 | 98.15 | 47          |
| Rec3   | 46460538 | 6.97G | 42624682   | 6.39G | 91.74                  | 99.97 | 98.26 | 47.50       |

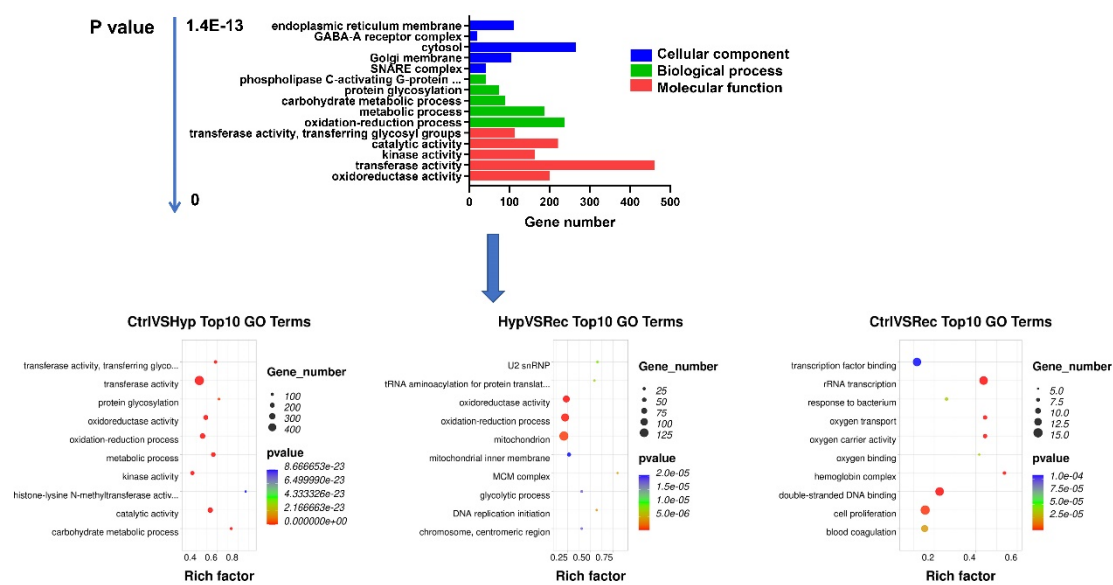

Figure S1. GO classification of Ctrl, Hyp and Rec DEGs.

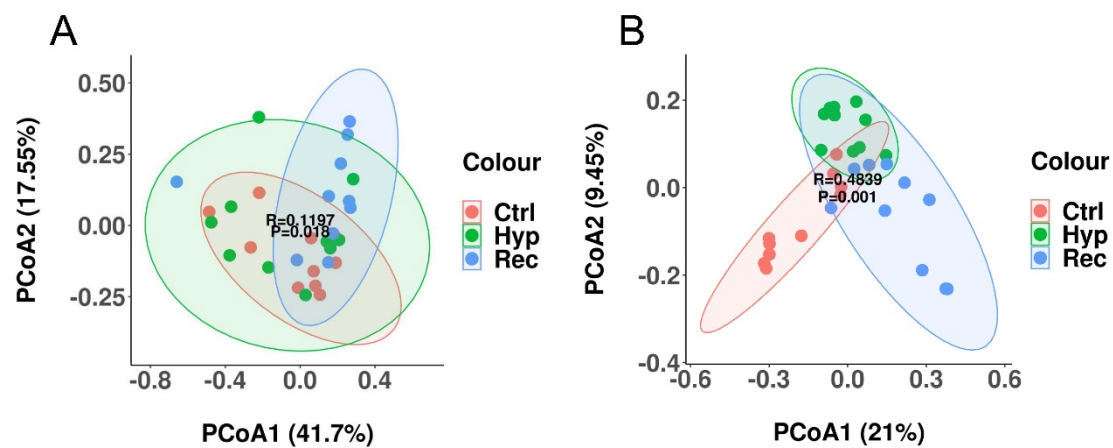

Figure S2. Btea diversity was analyzed based on weighted UniFrac(A) and unweighted UniFrac(B) PCoA analysis.

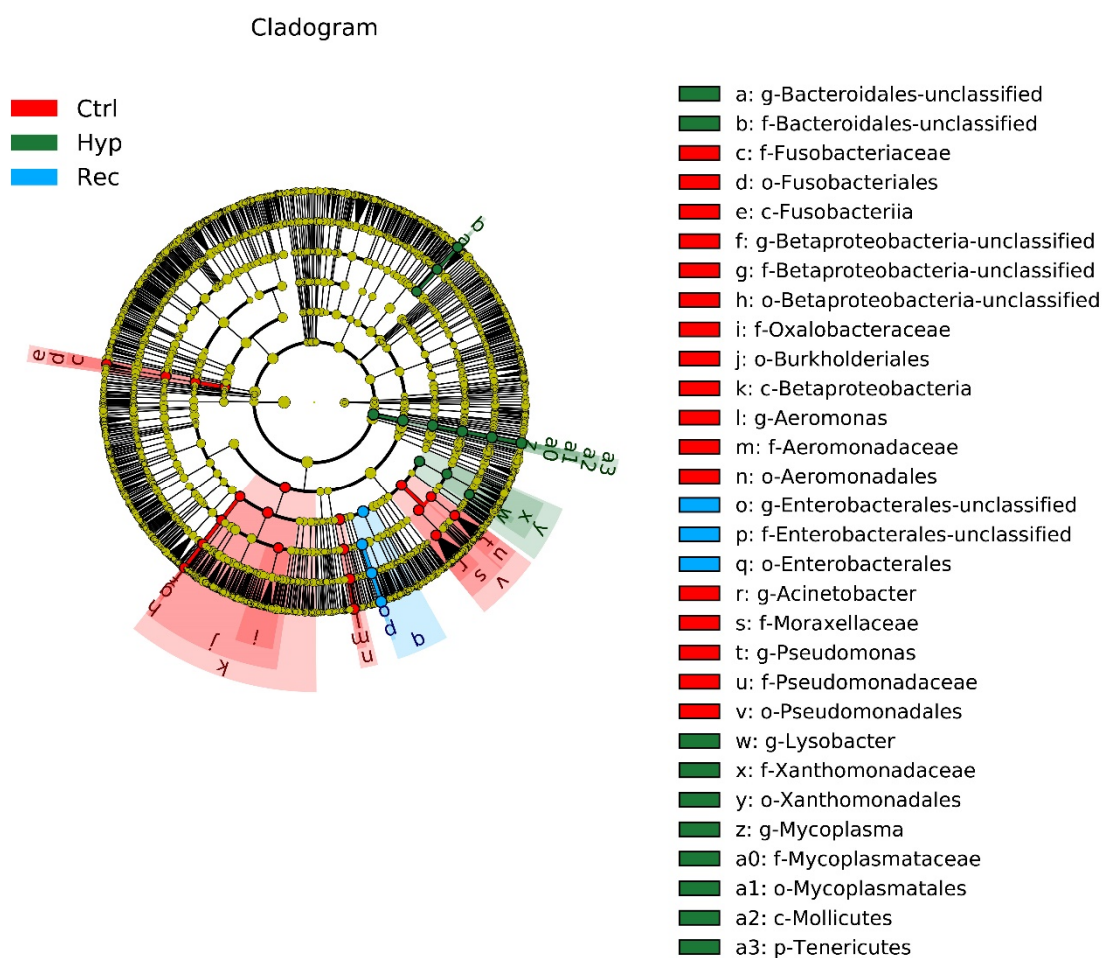

**Figure S3.** Taxonomic cladistics derived from Lefse analysis. Red, green, and blue represent Ctrl, Hyp, and Rec groups, respectively. The brightness is proportional to the abundance of taxa.
